# Supplementary material for: A Pd-catalyzed direct entry to 11-substituted 6H-isoindolo[2,1-a]indol-6-one derivatives as potential anticancer agents
Source: Royal Society of Chemistry journal article supplement (doi:10.1039/c5ra17908d), 2015-01-01
Supplement: c5ra17908d2.pdf [file c5ra17908d2.pdf]

### Copies of HPLC

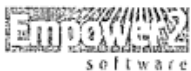

CPRI@DRILS

#### SAMPLE INFORMATION

|                   |                          |                     |                                |
|-------------------|--------------------------|---------------------|--------------------------------|
| Sample Name:      | ILS-RAJ-8-11             | Sample Set Name:    | 020315_2                       |
| A R Number:       | CM15C003                 | Acq. Method Set:    | MC                             |
| Vial:             | 59                       | Processing Method:  | MC_PRO                         |
| Injection #:      | 1                        | Channel Name:       | PDA Max Plot 190.0 - 800.0 @1  |
| Injection Volume: | 8.00 ul                  | Proc. Chnl. Descr.: | PDA MaxPlot (190.0 nm to 800.0 |
| Run Time:         | 12.0 Minutes             |                     |                                |
| Date Acquired:    | 3/2/2015 5:56:49 PM IST  |                     |                                |
| Date Processed:   | 3/3/2015 10:26:26 AM IST |                     |                                |

Column: Symmetry C-18 75\*4.6mm 3.5µm  
Mobile phase: A) 0.1% TFA in water B) ACN  
T/%B: 0/20, 0.5/20, 2/95, 8/95, 10/20, 12/20  
Flow: 1.0 ml/min, Diluent: ACN: WATER (90:10)

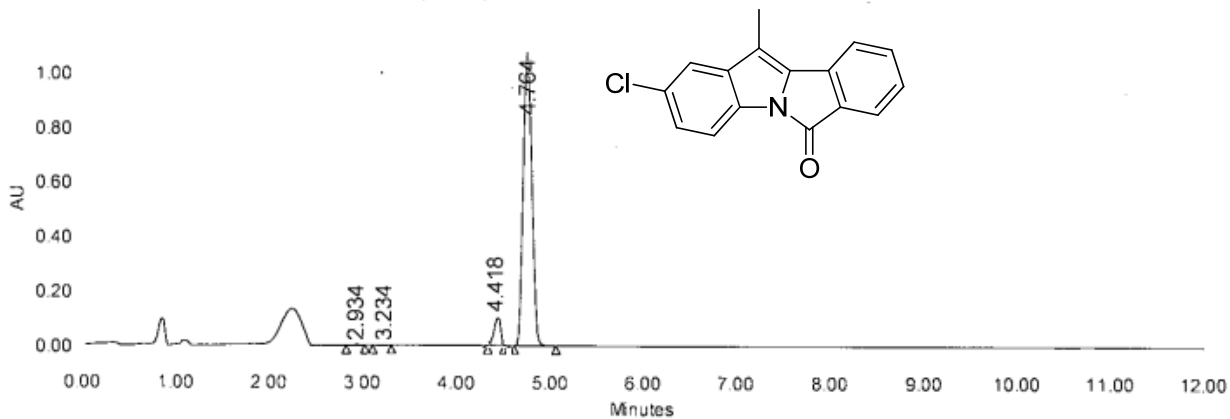

|   | RT    | Area    | % Area | Height  |
|---|-------|---------|--------|---------|
| 1 | 2.934 | 16059   | 0.20   | 2738    |
| 2 | 3.234 | 7934    | 0.10   | 1420    |
| 3 | 4.418 | 51097   | 3.23   | 41812   |
| 4 | 4.764 | 7804936 | 96.47  | 1365736 |

Analyzed By:

Checked By:

**SAMPLE INFORMATION**

|                   |                         |                     |              |
|-------------------|-------------------------|---------------------|--------------|
| Sample Name:      | ILS-RAJ-8-18            | Sample Set Name:    | 030315_1     |
| A R Number:       | CM15C005                | Acq. Method Set:    | MC           |
| Vial:             | 61                      | Processing Method:  | MC_PRO       |
| Injection #:      | 1                       | Channel Name:       | 220.0nm      |
| Injection Volume: | 8.00 ul                 | Proc. Chnl. Descr.: | PDA 220.0 nm |
| Run Time:         | 12.0 Minutes            |                     |              |
| Date Acquired:    | 3/3/2015 2:03:44 PM IST |                     |              |
| Date Processed:   | 3/3/2015 2:24:10 PM IST |                     |              |

Column: Symmetry C-18 75\*4.6mm 3.5µm  
 Mobile phase: A) 0.1% TFA in water B) ACN  
 T/%B: 0/20, 0.5/20, 2/95, 8/95, 10/20, 12/20  
 Flow: 1.0 ml/min, Diluent: ACN: WATER (90:10)

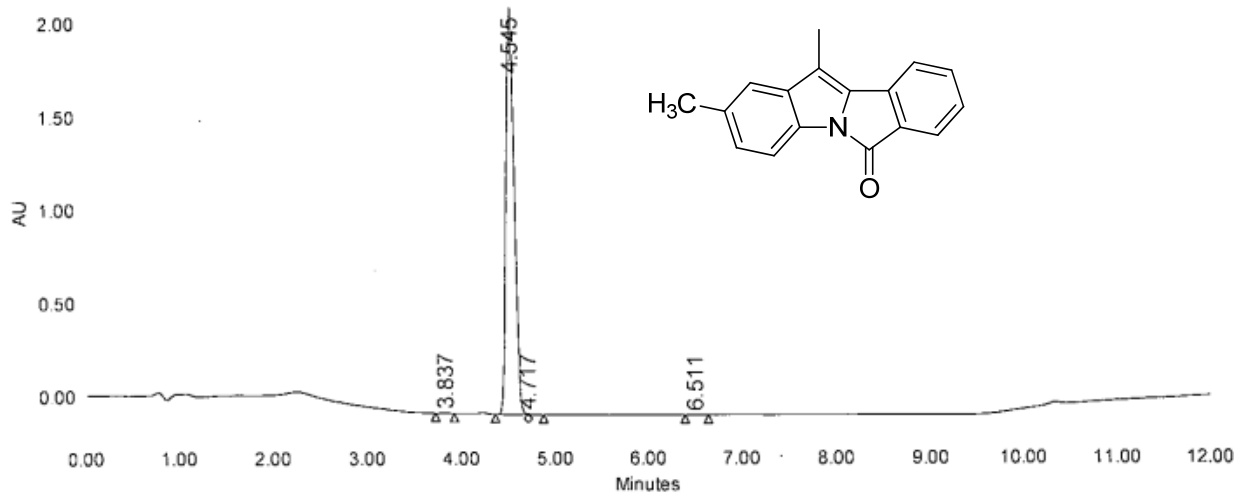

|   | RT    | Area     | % Area | Height  |
|---|-------|----------|--------|---------|
| 1 | 3.837 | 12475    | 0.09   | 2222    |
| 2 | 4.545 | 13136349 | 99.79  | 2154970 |
| 3 | 4.717 | 12954    | 0.10   | 3964    |
| 4 | 6.511 | 2187     | 0.02   | 300     |

Analyzed By:

Checked By:

*Handwritten signature and date: 3/3/15*

SAMPLE INFORMATION

|                   |                         |                     |              |
|-------------------|-------------------------|---------------------|--------------|
| Sample Name:      | ILS-RAJ-8-12            | Sample Set Name:    | 030315_1     |
| A R Number:       | CM15C004                | Acq. Method Set:    | MC           |
| Vial:             | 60                      | Processing Method:  | MC_PRO       |
| Injection #:      | 1                       | Channel Name:       | 230.0nm      |
| Injection Volume: | 8.00 ul                 | Proc. Chnl. Descr.: | PDA 230.0 nm |
| Run Time:         | 12.0 Minutes            |                     |              |
| Date Acquired:    | 3/3/2015 1:48:57 PM IST |                     |              |
| Date Processed:   | 3/3/2015 2:24:43 PM IST |                     |              |

Column: Symmetry C-18 75\*4.6mm 3.5µm  
 Mobile phase: A) 0.1% TFA in water B) ACN  
 T/%B: 0/20, 0.5/20, 2/95, 8/95, 10/20, 12/20  
 Flow: 1.0 ml/min, Diluent: ACN: WATER (90:10)

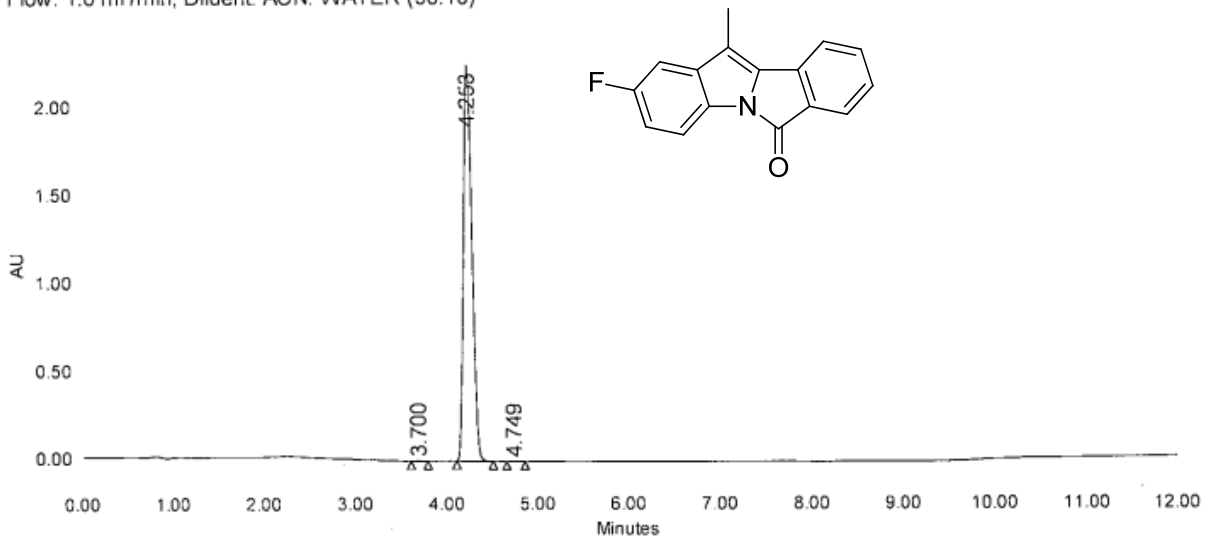

|   | RT    | Area     | % Area | Height  |
|---|-------|----------|--------|---------|
| 1 | 3.700 | 11420    | 0.08   | 2105    |
| 2 | 4.253 | 14550871 | 99.86  | 2246180 |
| 3 | 4.749 | 8770     | 0.06   | 1477    |

Analyzed By:

Checked By:

*af* 3/3/15

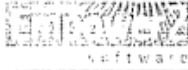

### SAMPLE INFORMATION

|                   |                          |                     |              |
|-------------------|--------------------------|---------------------|--------------|
| Sample Name:      | ILS-ARJ-R-G2             | Sample Set Name:    | 050515_1     |
| Sample Type:      | CM15E003                 | Acq. Method Set:    | MC           |
| Vial:             | 2                        | Processing Method:  | MC PRO       |
| Injection #:      | 1                        | Channel Name:       | 230.0nm      |
| Injection Volume: | 5.00 ul                  | Proc. Chnl. Descr.: | PDA 230.0 nm |
| Run Time:         | 12.0 Minutes             |                     |              |
| Date Acquired:    | 5/5/2015 4:38:08 PM IST  |                     |              |
| Date Processed:   | 5/6/2015 10:23:21 AM IST |                     |              |

Column: Symmetry C-18 75\*4.6mm 3.5µm  
Mobile phase: A) 0.1% TFA in water B) ACN  
T/%B 0/20, 0.5/20, 2/95, 8/95, 10/20, 12/20  
Flow 1.0 ml/min, Diluent: ACN: WATER (90:10)

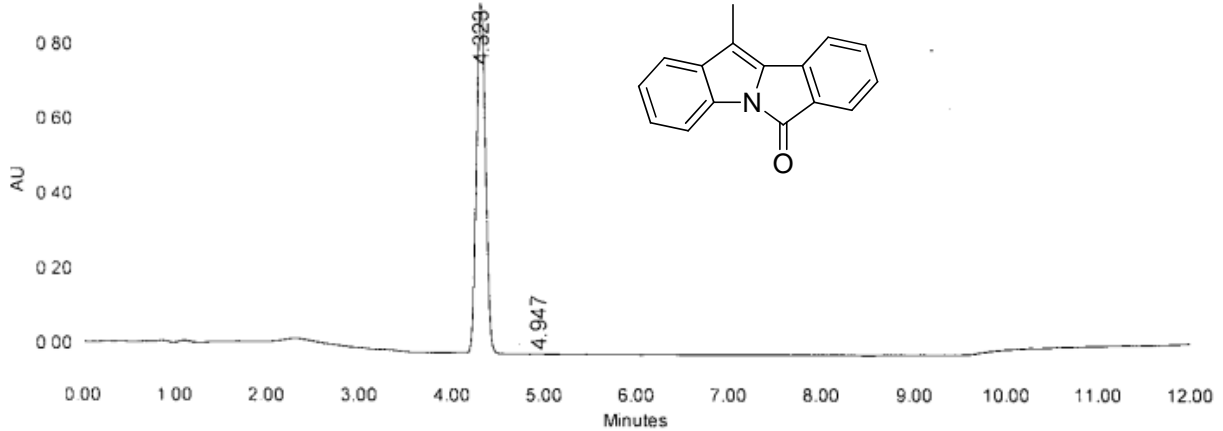

|   | RT    | Area    | % Area | Height |
|---|-------|---------|--------|--------|
| 1 | 4.323 | 6336270 | 99.95  | 937605 |
| 2 | 4.947 | 3389    | 0.05   | 487    |

Analyzed By: *M. S. S.*

Checked By:

**SAMPLE INFORMATION**

|                   |                           |                     |                                |
|-------------------|---------------------------|---------------------|--------------------------------|
| Sample Name:      | ILS-ARJ-8-19              | Sample Set Name:    | 120315_2                       |
| A R Number:       | CM15C020                  | Acq. Method Set:    | MC                             |
| Vial:             | 28                        | Processing Method:  | MC_PRO                         |
| Injection #:      | 1                         | Channel Name:       | PDA Max Plot 190.0 - 800.0     |
| Injection Volume: | 5.00 ul                   | Proc. Chnl. Descr.: | PDA MaxPlot (190.0 nm to 800.0 |
| Run Time:         | 12.0 Minutes              |                     |                                |
| Date Acquired:    | 3/12/2015 9:21:18 PM IST  |                     |                                |
| Date Processed:   | 3/13/2015 10:01:27 AM IST |                     |                                |

Column: Symmetry C-18 75\*4.6mm 3.5µm  
 Mobile phase: A) 0.1% TFA in water B) ACN  
 T/%B: 0/20, 0.5/20, 2/95, 8/95, 10/20, 12/20  
 Flow: 1.0 ml /min, Diluent: ACN: WATER (90:10)

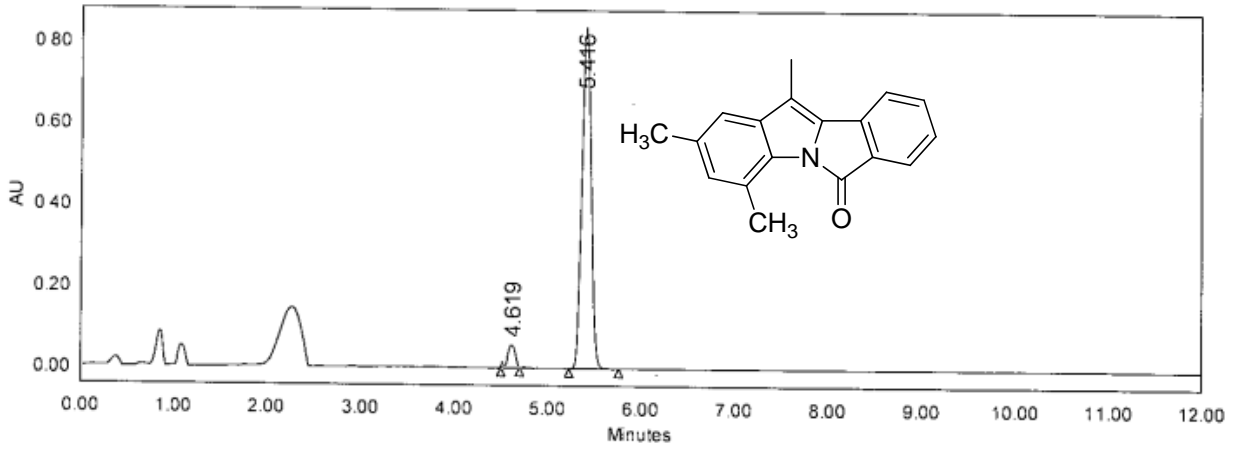

|   | RT    | Area    | % Area | Height |
|---|-------|---------|--------|--------|
| 1 | 4.619 | 116254  | 2.98   | 24661  |
| 2 | 5.416 | 5723827 | 97.02  | 833602 |

Analyzed By: *M/13/3/15*

Checked By:

SAMPLE INFORMATION

|                   |                         |                     |              |
|-------------------|-------------------------|---------------------|--------------|
| Sample Name:      | ILS-RAJ-8-22            | Sample Set Name:    | 030315_1     |
| A R Number:       | CM15C006                | Acq. Method Set:    | MC           |
| Vial:             | 62                      | Processing Method:  | MC_PRO       |
| Injection #:      | 1                       | Channel Name:       | 230.0nm      |
| Injection Volume: | 8.00 ul                 | Proc. Chnl. Descr.: | PDA 230.0 nm |
| Run Time:         | 12.0 Minutes            |                     |              |
| Date Acquired:    | 3/3/2015 2:18:45 PM IST |                     |              |
| Date Processed:   | 3/3/2015 2:50:47 PM IST |                     |              |

Column: Symmetry C-18 75\*4.6mm 3.5µm  
 Mobile phase: A) 0.1% TFA in water B) ACN  
 T/%B: 0/20, 0.5/20, 2/95, 8/95, 10/20, 12/20  
 Flow: 1.0 ml/min, Diluent: ACN: WATER (90:10)

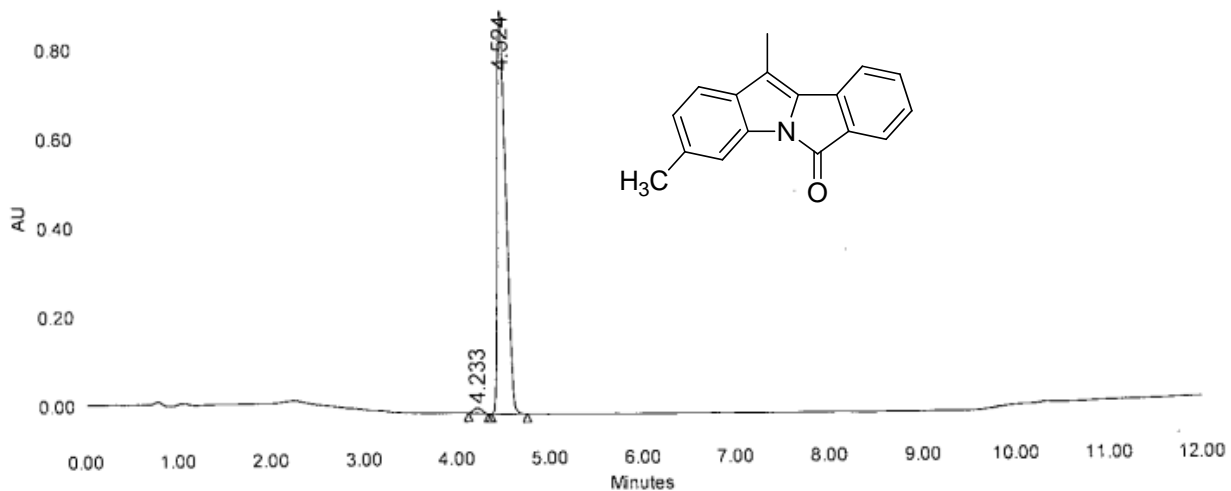

Analyzed By:

Checked By:

|   | RT    | Area    | % Area | Height |
|---|-------|---------|--------|--------|
| 1 | 4.233 | 74146   | 1.29   | 12573  |
| 2 | 4.524 | 5657572 | 98.71  | 909475 |

*Qyf 3/3/15*

**SAMPLE INFORMATION**

|                   |                          |                     |                               |
|-------------------|--------------------------|---------------------|-------------------------------|
| Sample Name:      | ILS-ARJ-25/A             | Sample Set Name:    | 120315_2                      |
| A R Number:       | CM15C017                 | Acq. Method Set:    | MC                            |
| Vial:             | 25                       | Processing Method:  | MC_PRO                        |
| Injection #:      | 1                        | Channel Name:       | 210.0nm                       |
| Injection Volume: | 5.00 ul                  | Proc. Chnl. Descr.: | PDA 210.0 nm Blank Subtracted |
| Run Time:         | 12.0 Minutes             |                     |                               |
| Date Acquired:    | 3/12/2015 8:34:06 PM IST |                     |                               |
| Date Processed:   | 3/13/2015 9:59:41 AM IST |                     |                               |

Column: Symmetry C-18 75\*4.6mm 3.5µm  
 Mobile phase: A) 0.1% TFA in water B) ACN  
 T/%B: 0/20, 0.5/20, 2/95, 8/95, 10/20, 12/20  
 Flow: 1.0 ml /min, Diluent: ACN: WATER (90:10)

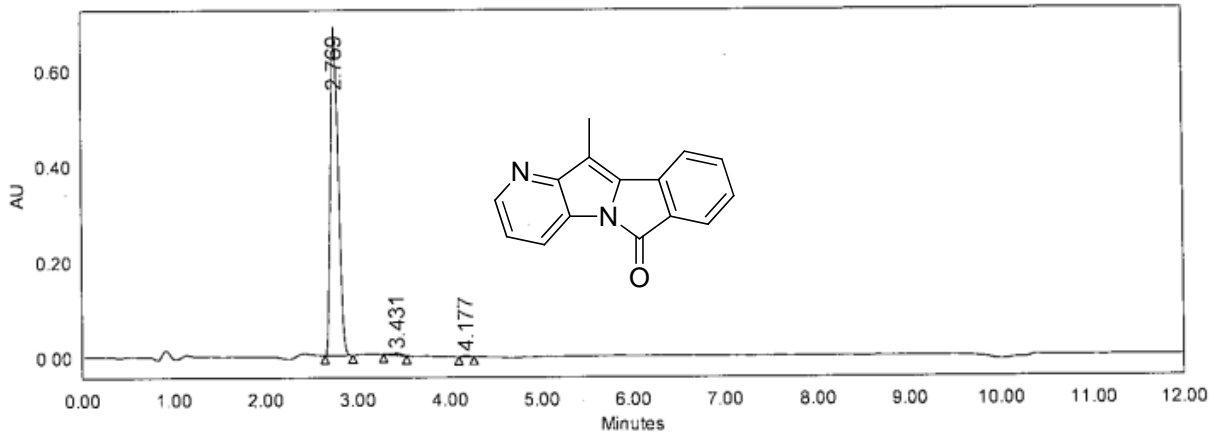

|   | RT    | Area    | % Area | Height |
|---|-------|---------|--------|--------|
| 1 | 2.769 | 3968632 | 98.94  | 670197 |
| 2 | 3.431 | 29212   | 0.73   | 4076   |
| 3 | 4.177 | 13297   | 0.33   | 2511   |

Analyzed By: *M. S. 3/15*

Checked By:

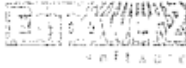

### SAMPLE INFORMATION

|                   |                          |                     |                               |
|-------------------|--------------------------|---------------------|-------------------------------|
| Sample Name:      | ILS-ARJ-8-31             | Sample Set Name:    | 050515_1                      |
| Sample Type:      | CM15E004                 | Acq. Method Set:    | MC                            |
| Vial:             | 3                        | Processing Method:  | MC PRO                        |
| Injection #:      | 1                        | Channel Name:       | 215.0nm                       |
| Injection Volume: | 5.00 ul                  | Proc. Chnl. Descr.: | PDA 215.0 nm Blank Subtracted |
| Run Time:         | 12.0 Minutes             |                     |                               |
| Date Acquired:    | 5/5/2015 4:53:52 PM IST  |                     |                               |
| Date Processed:   | 5/6/2015 10:27:52 AM IST |                     |                               |

Column: Symmetry C-18 75\*4.6mm 3.5µm  
Mobile phase: A) 0.1% TFA in water B) ACN  
T/%B 0/20, 0.5/20, 2/95, 8/95, 10/20, 12/20  
Flow: 1.0 ml/min, Diluent: ACN: WATER (90:10)

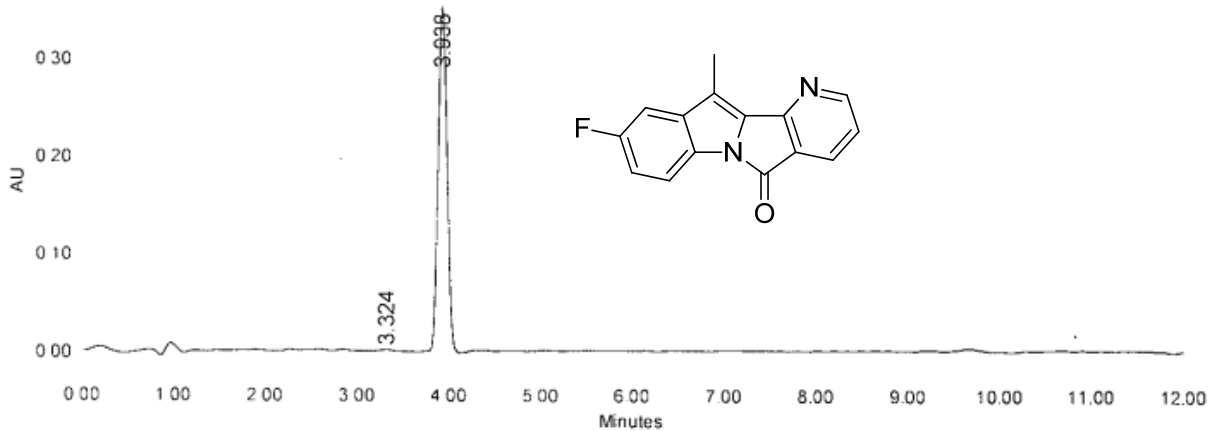

|   | RT    | Area    | % Area | Height |
|---|-------|---------|--------|--------|
| 1 | 3.324 | 11045   | 0.47   | 1443   |
| 2 | 3.938 | 2349097 | 99.53  | 353365 |

Analyzed By: *[Signature]*

Checked By:



**SAMPLE INFORMATION**

|                   |                          |                     |                                |
|-------------------|--------------------------|---------------------|--------------------------------|
| Sample Name:      | ILS-ARJ-34               | Sample Set Name:    | 120315_2                       |
| A R Number:       | CM15C019                 | Acq. Method Set:    | MC                             |
| Vial:             | 27                       | Processing Method:  | MC_PRO                         |
| Injection #:      | 1                        | Channel Name:       | PDA Max Plot 190.0 - 800.0     |
| Injection Volume: | 5.00 ul                  | Proc. Chnl. Descr.: | PDA MaxPlot (190.0 nm to 800.0 |
| Run Time:         | 12.0 Minutes             |                     |                                |
| Date Acquired:    | 3/12/2015 9:05:35 PM IST |                     |                                |
| Date Processed:   | 3/13/2015 9:55:54 AM IST |                     |                                |

Column: Symmetry C-18 75\*4.6mm 3.5µm  
 Mobile phase: A) 0.1% TFA in water B) ACN  
 T/%B: 0/20, 0.5/20, 2/95, 8/95, 10/20, 12/20  
 Flow: 1.0 ml /min, Diluent: ACN: WATER (90:10)

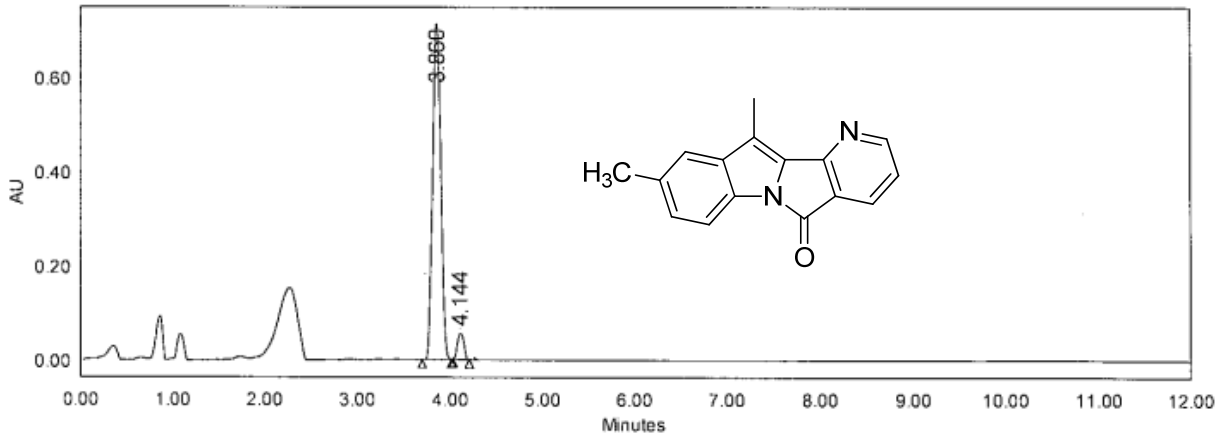

|   | RT    | Area    | % Area | Height |
|---|-------|---------|--------|--------|
| 1 | 3.860 | 4398808 | 95.06  | 716399 |
| 2 | 4.144 | 236263  | 4.94   | 37876  |

Analyzed By: *M. J. S. / S. H.*

Checked By:

SAMPLE INFORMATION

|                   |                         |                     |                               |
|-------------------|-------------------------|---------------------|-------------------------------|
| Sample Name:      | ILS-ARJ-8-43            | Sample Set Name:    | 140515                        |
| Sample Type:      | CM15E019                | Acq. Method Set:    | MC                            |
| Vial:             | 6                       | Processing Method:  | MC PRO                        |
| Injection #:      | 1                       | Channel Name:       | 200.0nm                       |
| Injection Volume: | 8.00 ul                 | Proc. Chnl. Descr.: | PDA 200.0 nm Blank Subtracted |
| Run Time:         | 12.0 Minutes            |                     |                               |
| Date Acquired:    | 5/14/2015 1:12:25 PMIST |                     |                               |
| Date Processed:   | 5/14/2015 3:42:20 PMIST |                     |                               |

Column: Symmetry C-18 75\*4.6mm 3.5µm  
 Mobile phase: A) 0.1% TFA in water B) ACN  
 T/%B: 0/20, 0.5/20, 2/95, 8/95, 10/20, 12/20  
 Flow: 1.0 ml/min, Diluent: ACN: WATER (90:10)

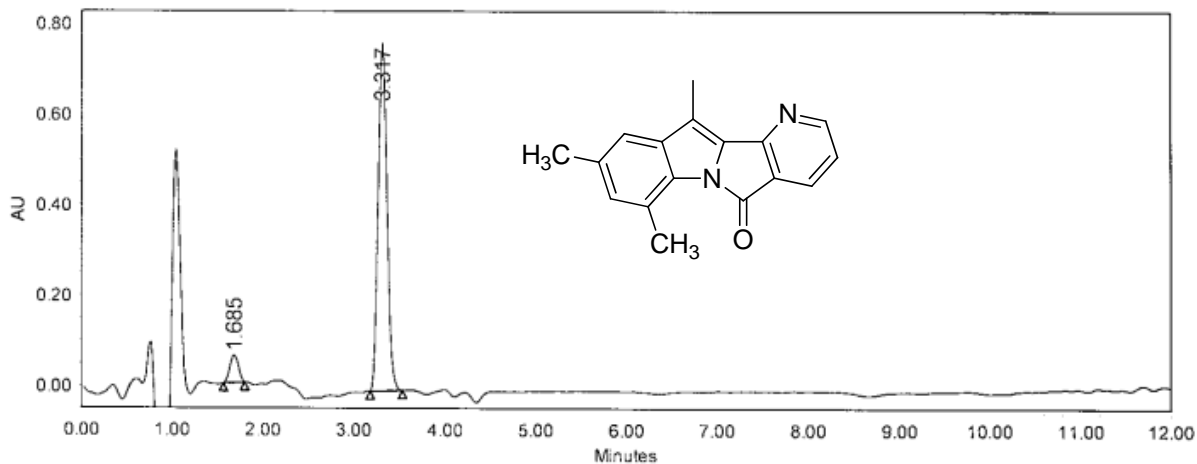

|   | RT    | Area    | % Area | Height |
|---|-------|---------|--------|--------|
| 1 | 1.685 | 384250  | 6.92   | 59535  |
| 2 | 3.317 | 5166853 | 93.08  | 764838 |

Analyzed By:

Checked By:

*Handwritten signature and date: 5/14/15*

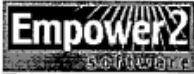

CPRI@DRILS

### SAMPLE INFORMATION

|                   |                           |                     |                               |
|-------------------|---------------------------|---------------------|-------------------------------|
| Sample Name:      | ILS-ARJ-8-49-A            | Sample Set Name:    | 250515                        |
| Sample Type:      | CM15E028                  | Acq. Method Set:    | MC                            |
| Vial:             | 28                        | Processing Method:  | MC PRO                        |
| Injection #:      | 1                         | Channel Name:       | 225.0nm                       |
| Injection Volume: | 4.00 ul                   | Proc. Chnl. Descr.: | PDA 225.0 nm Blank Subtracted |
| Run Time:         | 12.0 Minutes              |                     |                               |
| Date Acquired:    | 5/25/2015 10:12:03 AM IST |                     |                               |
| Date Processed:   | 5/25/2015 12:09:48 PM IST |                     |                               |

Column: Symmetry C-18 75\*4.6mm 3.5µm  
Mobile phase: A) 0.1% TFA in water B) ACN  
T/B: 0/20, 0.5/20, 2/95, 8/95, 10/20, 12/20  
Flow: 1.0 ml/min, Diluent: ACN: WATER (90:10)

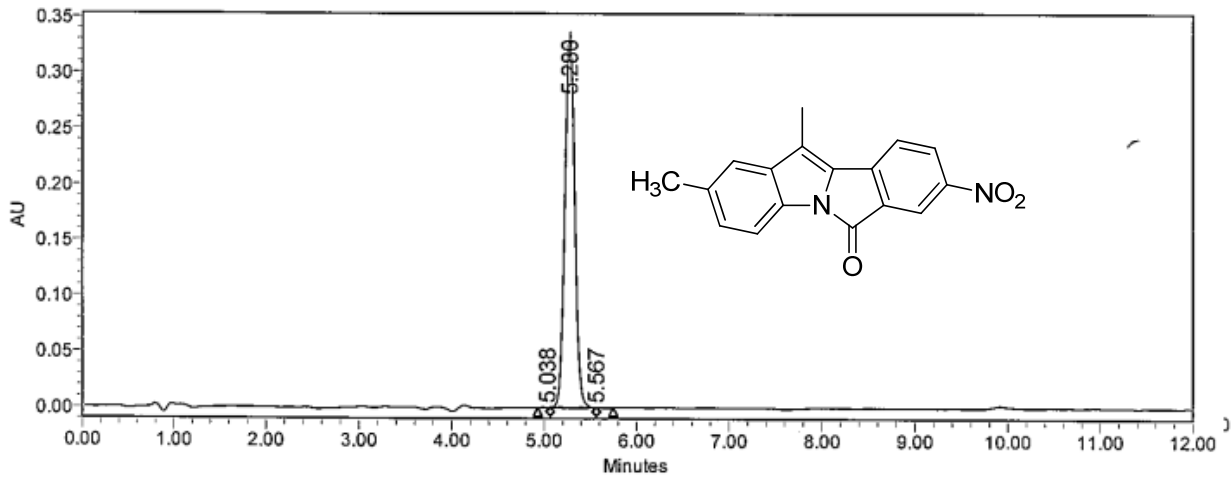

|   | RT    | Area    | % Area | Height |
|---|-------|---------|--------|--------|
| 1 | 5.038 | 2506    | 0.10   | 492    |
| 2 | 5.280 | 2495240 | 99.83  | 335578 |
| 3 | 5.567 | 1791    | 0.07   | 359    |

Analyzed By:

*Def 25/05/15*

Checked By:

**SAMPLE INFORMATION**

|                   |                          |                     |              |
|-------------------|--------------------------|---------------------|--------------|
| Sample Name:      | ILS-ARJ-8-51             | Sample Set Name:    | 260315_1     |
| A R Number:       | CM15C034                 | Acq. Method Set:    | MC           |
| Vial:             | 5                        | Processing Method:  | MC_PRO       |
| Injection #:      | 1                        | Channel Name:       | 230.0nm      |
| Injection Volume: | 5.00 ul                  | Proc. Chnl. Descr.: | PDA 230.0 nm |
| Run Time:         | 12.0 Minutes             |                     |              |
| Date Acquired:    | 3/26/2015 1:39:09 PM IST |                     |              |
| Date Processed:   | 3/26/2015 2:23:43 PM IST |                     |              |

Column: Symmetry C-18 75\*4.6mm 3.5µm  
 Mobile phase: A) 0.1% TFA in water B) ACN  
 T/%B: 0/20, 0.5/20, 2/95, 8/95, 10/20, 12/20  
 Flow: 1.0 ml /min, Diluent: ACN: WATER (90:10)

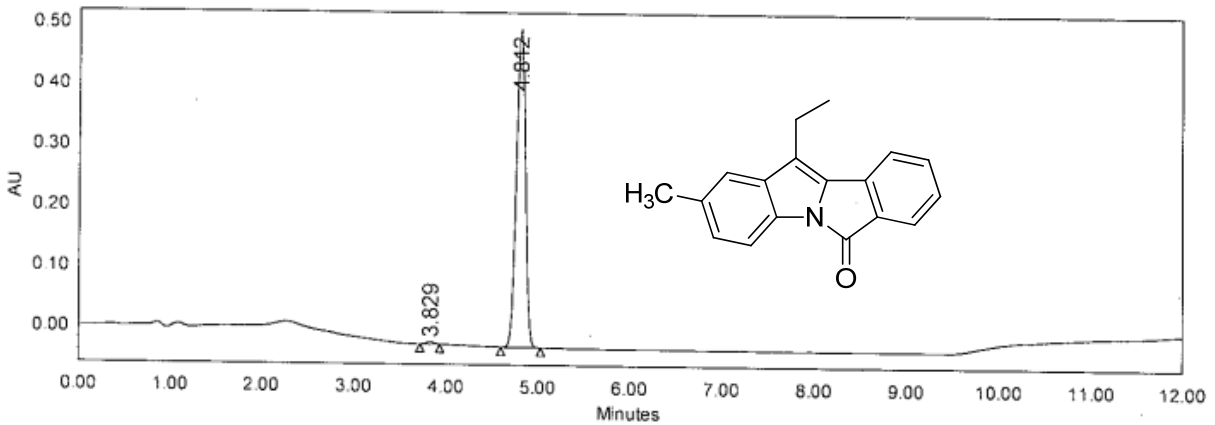

|   | RT    | Area    | % Area | Height |
|---|-------|---------|--------|--------|
| 1 | 3.829 | 25713   | 0.71   | 4251   |
| 2 | 4.812 | 3578799 | 99.29  | 523087 |

Analyzed By:

Checked By:

*af* 3/26/15

CPRI @ DRILS  
HPLC ANALYSIS REPORT

Inj Date : Tue, 7. Apr. 2015 Acq Operator: SHASHIDHAR  
 Sample Name : ILS-ARJ-8-57 Vial 25  
 A R Number : CM15D002 ->Inj. Vol. : 5µL  
 Acq. Method : D:\CHEM32\_002\1\METHODS\MC.M  
 Analysis Method : D:\CHEM32\_002\1\METHODS\MC.M  
 Method Info : Column: Symmetry C-18 75\*4.6mm 3.5µm  
 Mobile phase: A) 0.1% TFA in water ,B) ACN  
 T/%B:0/20,0.5/20,2/95,10/95,10.5/20,12/20  
 Flow:1.0mL/min Diluent: ACN:Water(80:20)

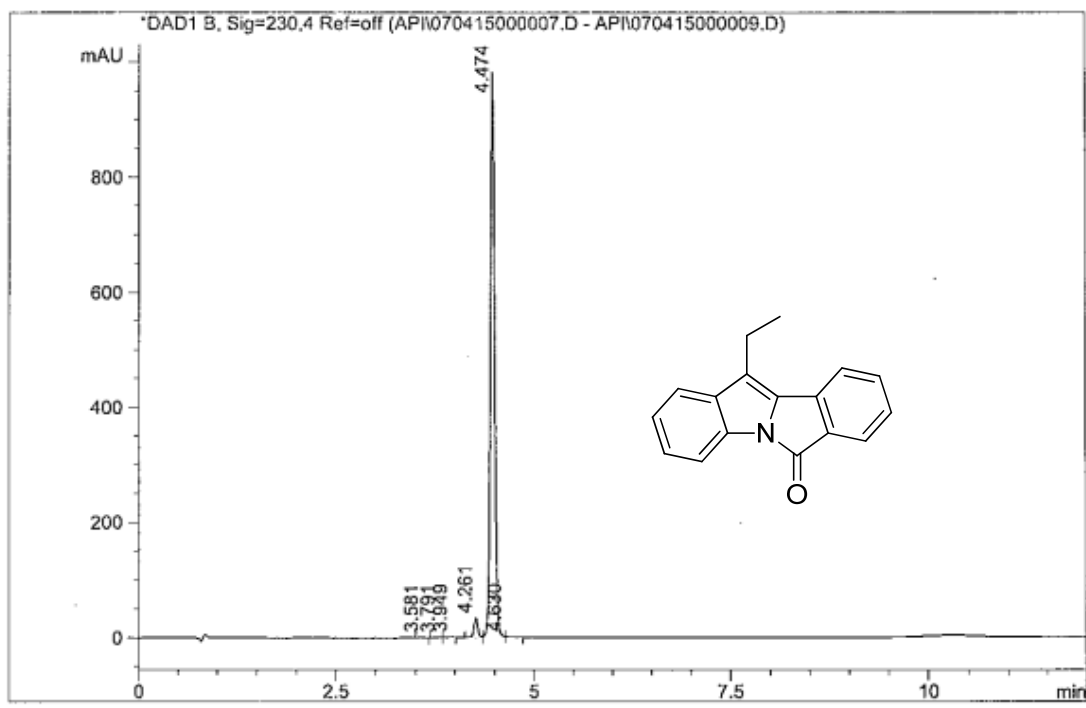

Signal 1: DAD1 B, Sig=230,4 Ref=off

| Peak # | RT [min] | Area     | Area % |
|--------|----------|----------|--------|
| 1      | 3.581    | 3.740    | 0.098  |
| 2      | 3.791    | 2.073    | 0.055  |
| 3      | 3.949    | 4.416    | 0.116  |
| 4      | 4.261    | 116.562  | 3.065  |
| 5      | 4.474    | 3670.243 | 96.522 |
| 6      | 4.630    | 5.465    | 0.144  |

Analysed by : *M*  
7/4/15

Checked by :

SAMPLE INFORMATION

|                   |                           |                     |              |
|-------------------|---------------------------|---------------------|--------------|
| Sample Name:      | ILS-ARJ-8-61              | Sample Set Name:    | 170415       |
| AR Number         | CM15D009                  | Acq. Method Set:    | MC           |
| Vial:             | 13                        | Processing Method:  | MC_PRO       |
| Injection #:      | 1                         | Channel Name:       | 245.0nm      |
| Injection Volume: | 7.00 ul                   | Proc. Chnl. Descr.: | PDA 245.0 nm |
| Run Time:         | 12.0 Minutes              |                     |              |
| Date Acquired:    | 4/17/2015 12:19:53 PM IST |                     |              |
| Date Processed    | 4/17/2015 2:20:29 PM IST  |                     |              |

Column: Symmetry C-18 75\*4.6mm 3.5µm  
 Mobile phase: A) 0.1% TFA in water B) ACN  
 T/%B: 0/20, 0.5/20, 2/95, 8/95, 10/20, 12/20  
 Flow: 1.0 ml /min, Diluent: ACN: WATER (90:10)

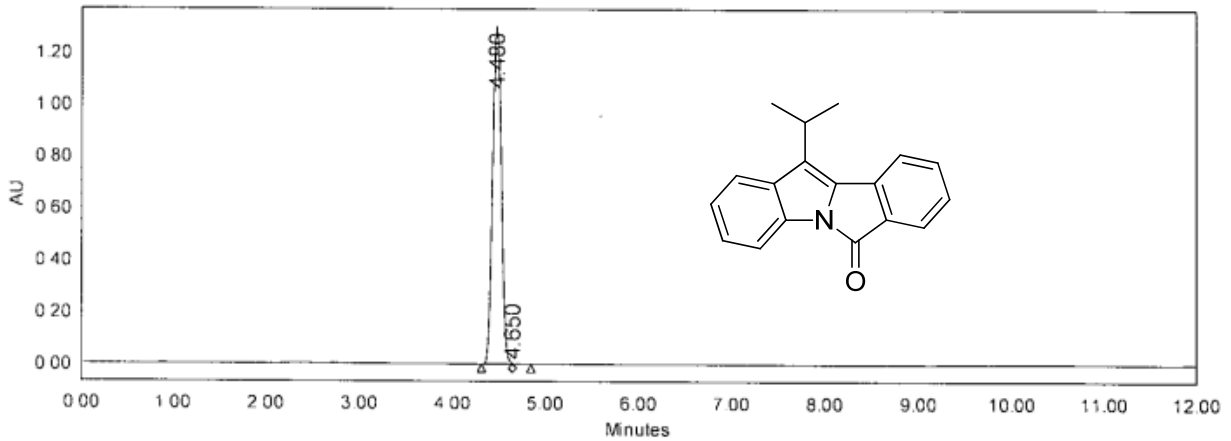

|   | RT    | Area    | % Area | Height  |
|---|-------|---------|--------|---------|
| 1 | 4.480 | 8453898 | 99.88  | 1298821 |
| 2 | 4.650 | 10428   | 0.12   | 2994    |

Analyzed By:

Checked By:

*CPRI@DRILS*

SAMPLE INFORMATION

|                   |                          |                     |                               |
|-------------------|--------------------------|---------------------|-------------------------------|
| Sample Name:      | ILS-ARJ-8-53             | Sample Set Name:    | 050515_1                      |
| Sample Type:      | CM15E005                 | Acq. Method Set:    | MC                            |
| Vial:             | 4                        | Processing Method:  | MC PRO                        |
| Injection #:      | 1                        | Channel Name:       | 210.0nm                       |
| Injection Volume: | 5.00 ul                  | Proc. Chnl. Descr.: | PDA 210.0 nm Blank Subtracted |
| Run Time:         | 12.0 Minutes             |                     |                               |
| Date Acquired:    | 5/5/2015 5:09:36 PM IST  |                     |                               |
| Date Processed:   | 5/6/2015 10:30:42 AM IST |                     |                               |

Column: Symmetry C-18 75\*4.6mm 3.5µm  
 Mobile phase: A) 0.1% TFA in water B) ACN  
 T/%B: 0/20, 0.5/20, 2/95, 8/95, 10/20, 12/20  
 Flow: 1.0 ml/min, Diluent: ACN: WATER (90:10)

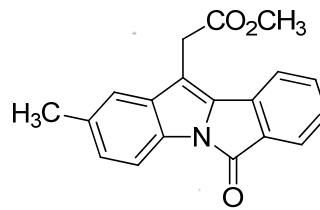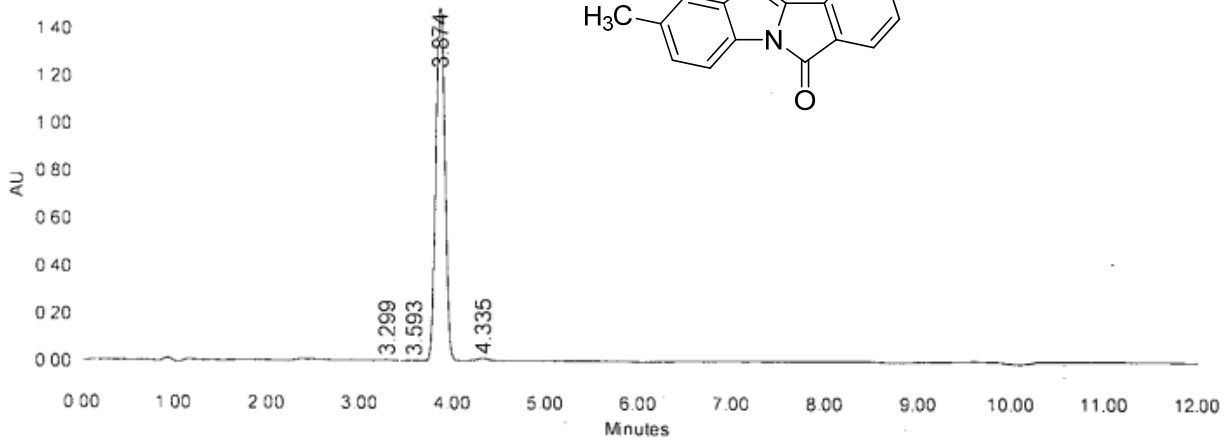

|   | RT    | Area     | % Area | Height  |
|---|-------|----------|--------|---------|
| 1 | 3.299 | 23807    | 0.23   | 2502    |
| 2 | 3.593 | 10626    | 0.10   | 1560    |
| 3 | 3.874 | 10052861 | 98.75  | 1495385 |
| 4 | 4.335 | 92516    | 0.91   | 11016   |

Analyzed By: *M. J. S. W.*

Checked By:

CPRI @ DRILS  
HPLC ANALYSIS REPORT

Inj Date : Tue, 7. Apr. 2015 Acq Operator: SHASHIDHAR  
Sample Name : ILS-ARJ-8-55 Vial 27  
A R Number : CM15D004 ->Inj. Vol. : 7µL  
Acq. Method : D:\CHEM32\_002\1\METHODS\MC.M  
Analysis Method : D:\CHEM32\_002\1\METHODS\MC.M  
Method Info : Column: Symmetry C-18 75\*4.6mm 3.5µm  
Mobile phase: A) 0.1% TFA in water ,B) ACN  
T/%B:0/20,0.5/20,2/95,10/95,10.5/20,12/20  
Flow:1.0mL/min Diluent: ACN:Water(80:20)

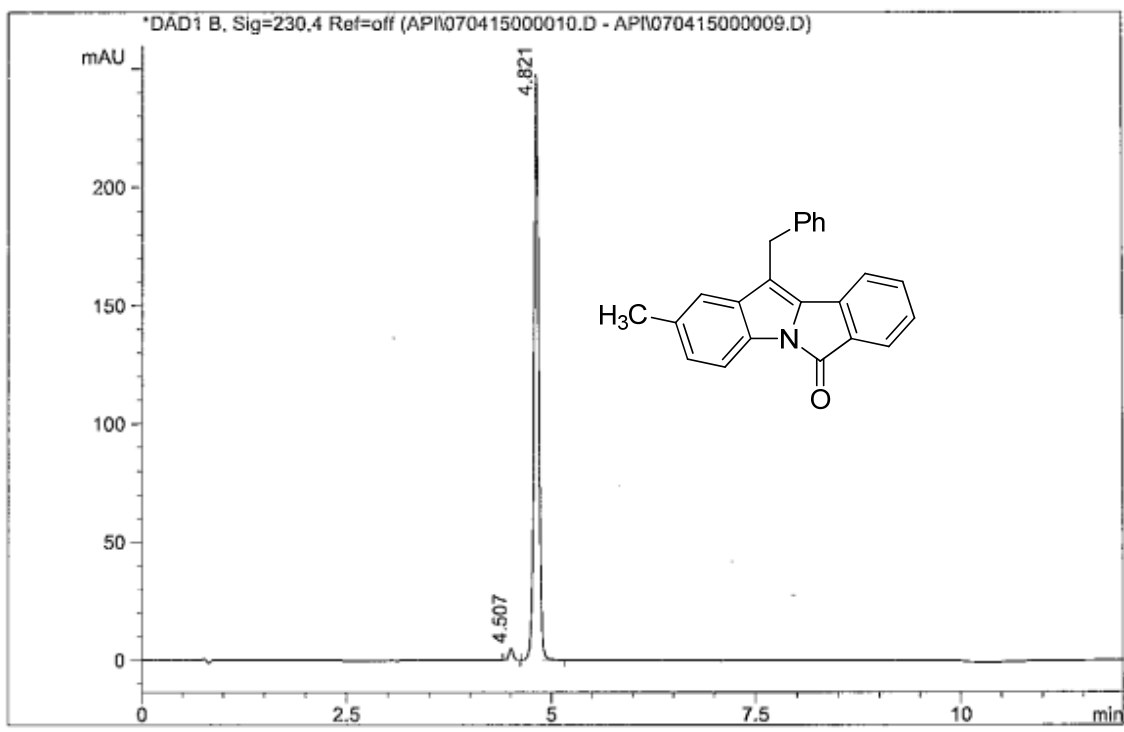

Signal 1: DAD1 B, Sig=230,4 Ref=off

| Peak # | RT [min] | Area     | Area % |
|--------|----------|----------|--------|
| 1      | 4.507    | 17.490   | 1.716  |
| 2      | 4.821    | 1001.470 | 98.284 |

Analysed by :

*M*  
7/4/15

Checked by :



CPRI @ DRILS  
HPLC ANALYSIS REPORT

Inj Date : Tue, 7. Apr. 2015 Acq Operator: SHASHIDHAR  
Sample Name : ILS-ARJ-8-59 Vial 26  
A R Number : CM15D003 ->Inj. Vol. : 7µL  
Acq. Method : D:\CHEM32\_002\1\METHODS\MC.M  
Analysis Method : D:\CHEM32\_002\1\METHODS\MC.M  
Method Info : Column: Symmetry C-18 75\*4.6mm 3.5µm  
Mobile phase: A) 0.1% TFA in water ,B) ACN  
T/%B:0/20,0.5/20,2/95,10/95,10.5/20,12/20  
Flow:1.0mL/min Diluent: ACN:Water(80:20)

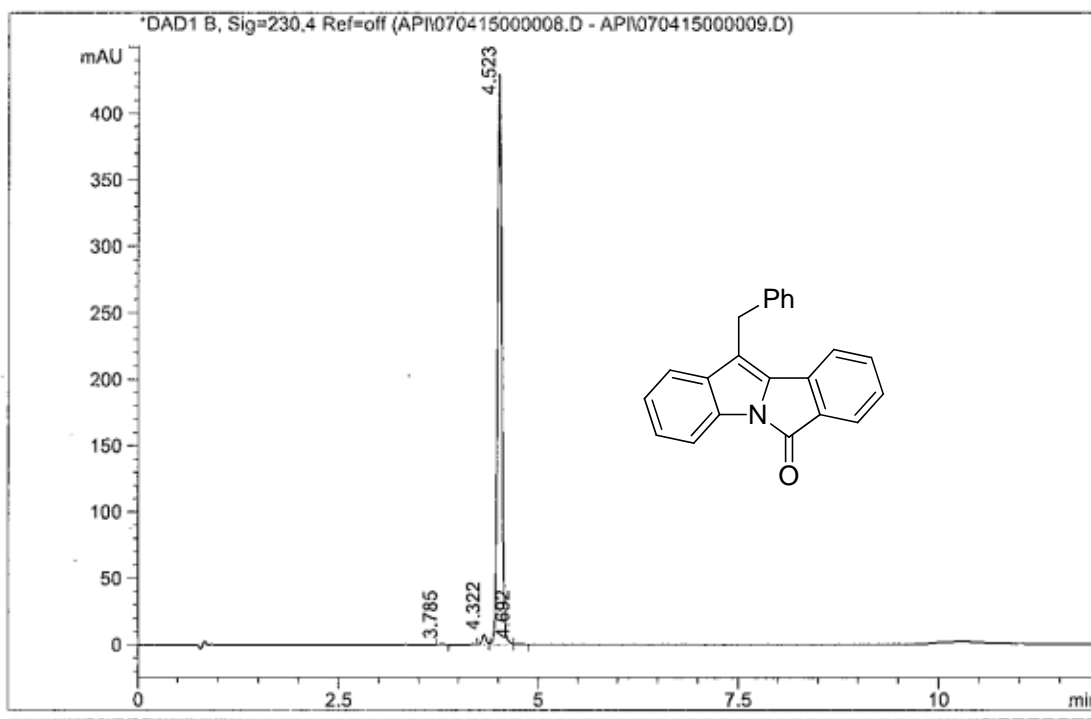

Signal 1: DAD1 B, Sig=230,4 Ref=off

| Peak # | RT [min] | Area     | Area % |
|--------|----------|----------|--------|
| 1      | 3.785    | 1.739    | 0.106  |
| 2      | 4.322    | 24.297   | 1.482  |
| 3      | 4.523    | 1611.587 | 98.293 |
| 4      | 4.692    | 1.944    | 0.119  |

Analysed by :

*Handwritten signature*  
7/4/15

Checked by :

SAMPLE INFORMATION

|                   |                           |                     |              |
|-------------------|---------------------------|---------------------|--------------|
| Sample Name:      | ILS-ARJ-8-64              | Sample Set Name:    | 170415       |
| AR Number:        | CM15D010                  | Acq. Method Set:    | MC           |
| Vial:             | 14                        | Processing Method:  | MC_PRO       |
| Injection #:      | 1                         | Channel Name:       | 245.0nm@1    |
| Injection Volume: | 5.00 ul                   | Proc. Chnl. Descr.: | PDA 245.0 nm |
| Run Time:         | 12.0 Minutes              |                     |              |
| Date Acquired:    | 4/17/2015 12:34:38 PM IST |                     |              |
| Date Processed:   | 4/17/2015 2:21:06 PM IST  |                     |              |

Column: Symmetry C-18 75\*4.6mm 3.5µm  
 Mobile phase A) 0.1% TFA in water B) ACN  
 T/%B: 0/20, 0.5/20, 2/95, 8/95, 10/20, 12/20  
 Flow: 1.0 ml/min, Diluent: ACN: WATER (90:10)

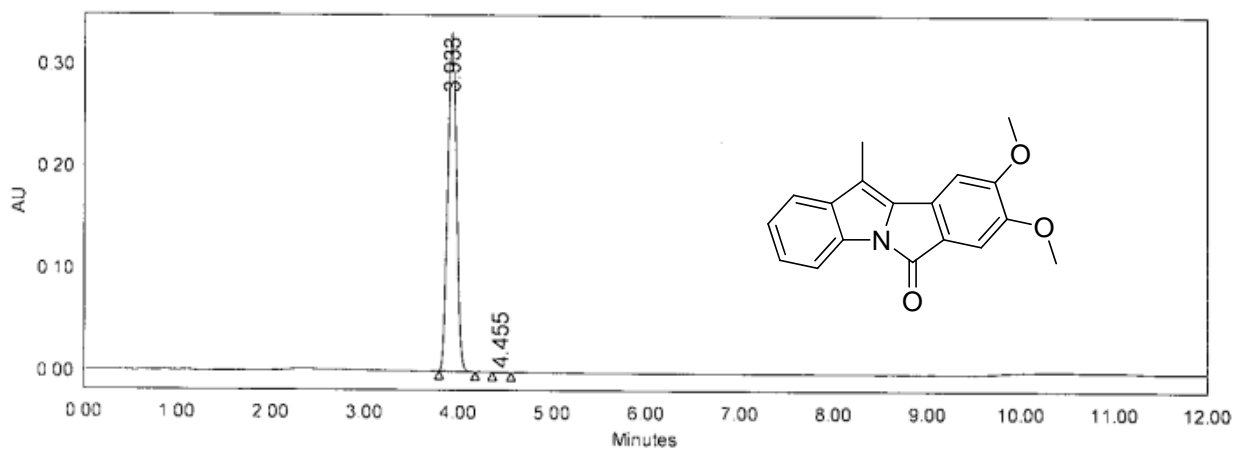

|   | RT    | Area    | % Area | Height |
|---|-------|---------|--------|--------|
| 1 | 3.933 | 2134999 | 99.94  | 330010 |
| 2 | 4.455 | 1267    | 0.06   | 212    |

Analyzed By:

Checked By:

*Handwritten signature and date: 12/4/15*
